# Supplementary material
Source: publisher figshare collection journal article supplement (https://tandf.figshare.com/ndownloader/files/23173061)
Supplement: Supplementary file 1 [file 23173061]

Supplement information

Synthesis and structure of pyrido[1,2-*a*]quinazoline condensed derivatives

O.Yu. Voskoboinika, V.V. Stavytskyia, O.M. Antypenkoa, M.S. Kazunina, D.V. Kravtsova, S.V. Shishkinab, S.I. Kovalenkoa

aDepartment of Organic and Bioorganic Chemistry, Zaporizhzhia State Medical University, 26 Maiakovski ave., Zaporizhzhia, 69035, Ukraine

bSSI «Institute for Single Crystals», National Academy of Science of Ukraine

**General part**

Melting points were determined in open capillary tubes in a «Mettler Toledo МР 50» apparatus and were uncorrected. The elemental analyses (C, H, N) were performed using the ELEMENTAR vario EL cube analyzer (USA). IR spectra were recorded on a Shimadzu IR Prestige-21 Fourier spectrometer fitted with an attenuated total reflectance sampling accessory. Analyses were indicated by the symbols of the elements or functions within ±0.3% of the theoretical values. 1H NMR spectra (400 MHz) and 13C NMR spectra (100 MHz) were recorded on a Varian-Mercury 400 (Varian Inc., Palo Alto, CA, USA) spectrometers with TMS as internal standard in DMSO-d6 solution. LC-MS were recorded using chromatography/mass spectrometric system which consists of high performance liquid chromatography «Agilent 1100 Series» (Agilent, Palo Alto, CA, USA) equipped with diode-matrix and mass-selective detector «Agilent LC/MSD SL» (atmospheric pressure chemical ionization – APCI). Electron impact mass spectra (EI-MS) were recorded on a Varian 1200 L instrument at 70 eV (Varian, USA). The purity of all obtained compounds was checked by 1H-NMR and LC-MS.

9*a*-Methyl-7,8,9,9*a*-tetrahydro-6*H*-benzo[4,5]imidazo[1,2-*c*]pyrido[1,2-*a*]quinazolin-6-one (**2.1**). Yield: 62%; mp = 121-123°С, IR (cm-1): 3414, 2930, 1674, 1628, 1603, 1537, 1472, 1380, 1366, 1335, 1320, 1298, 1279, 1254, 1185, 1159, 1130, 1100, 1049, 1034, 981, 943, 842, 825, 760, 740, 702, 549, 527, 471; 1H NMR (400 MHz, DMSO-*d*6) δ 8.17 (d, *J* = 7.6 Hz, 1H, H-1), 8.02 – 6.73 (m, 7H, H-2,3,4,11,12,13,14), 3.16 – 2.91 (m, 2H, H-7,7`), 2.78 – 2.66 (m, 1H, H-9), 2.60 – 2.51 (m, 1H, H-9`), 2.22 – 1.84 (m, 2H, H-8,8`), 1.58 (s, 3H, 9a-CH3). 13C NMR (126 MHz, DMSO) δ 169.8, 147.0, 144.3, 135.0, 132.6, 130.3, 128.1, 126.9, 125.1, 123.6, 122.8, 121.7, 120.2, 112.9, 77.3 (C-9a), 33.7, 26.9, 24.1, 17.0; EI-MS (m/z (I%rel.): 304 (10.2), 303 (63.2), 302 (19.2), 288 (14.5), 275 (24.3), 274 (20.1), 261 (27.3), 260 (74.8), 248 (39.2), 247 (94.7), 246 (41.8), 234 (72.3), 233 (100.0), 231 (86.7), 219 (10.9), 207 (17.3), 206 (8.7), 205 (10.4), 194 (52.1), 192 (23.7), 164 (16.8), 143 (27.2), 131 (5.6), 130 (8.4), 129 (21.2), 116 (5.5), 115 (8.9), 103 (16.3), 102 (60.3), 90 (32.1), 77 (19.5), 76 (28.8), 75 (17.3), 64 (30.9), 63 (20.5), 62 (10.3), 55 (16.3), 52 (15.3), 51 (14.8), 45 (14.1), 44 (10.2), 42 (9.2), 39 (27.5); LC-MS: m/z = 304 [M+1]; Anal. Calcd. for C19H17N3O: C, 75.23; H, 5.65; N, 13.85; found: C, 75.27; H, 5.69; N, 13.88.

2,4*a*-Dimethyl-4*a*,5,6,7-tetrahydro-8*H*-pyrido[1,2*-a*][1,2,4]triazolo[1,5-*c*]quinazolin-8-one (**2.2**). Yield: 59 %; mp = 203-205°С, 1H NMR (400 MHz, DMSO-*d*6) δ 7.86 (d, *J* = 7.6 Hz, 1H, H-13), 7.66 (d, *J* = 8.0 Hz, 1H, H-10), 7.48 (t, *J* = 7.5 Hz, 1H, H-11), 7.38 (t, *J* = 7.5 Hz, 1H, H-12), 3.06 – 2.96 (m, 1H, H-7), 2.73 – 2.59 (m, 1H, H-7`), 2.48 – 2.41 (m, 2H, H-5,5`), 2.36 (s, 3H, 2-CH3), 2.06 – 1.83 (m, 2H, H-6,6`), 1.43 (s, 3H, 4a-CH3). 13C NMR (126 MHz, DMSO) δ 169.4, 160.4, 148.5, 134.1, 130.4, 128.5, 127.1, 124.0, 119.6, 76.6 (C-4a), 33.5, 32.0, 26.9, 16.7, 14.4; LC-MS: m/z = 269 [M+1]; Anal. Calcd. for C15H16N4O: C, 67.15; H, 6.01; N, 20.88; found: C, 67.19; H, 6.09; N, 20.93.

2-(2-Chlorophenyl)-4*a*-methyl-4*a*,5,6,7-tetrahydro-8*H*-pyrido[1,2-*a*][1,2,4]triazolo[1,5-*c*]quinazolin-8-one (**2.3**). Yield: 67 %; mp = 146-149°С, IR (cm-1): 3434, 2926, 1682, 1632, 1610, 1597, 1581, 1545, 1507, 1479, 1464, 1444, 1424, 1383, 1372, 1360, 1335, 1319, 1278, 1255, 1208, 1197, 1172, 1140, 1120, 1098, 1053, 1035, 977, 958, 945, 914, 875, 856, 832, 785, 777, 759, 751, 718, 703, 664, 652, 559, 535, 517, 491, 466, 456;1H NMR (400 MHz, DMSO-*d*6) δ 8.00 (d, *J* = 7.7 Hz, 1H, H-13), 7.98 – 7.93 (m, 1H, 2-Ar H-6), 7.72 (d, *J* = 7.9 Hz, 1H, H-10), 7.61 – 7.32 (m, 5H, H-11,12, 2-Ar H-3,4,5), 3.27 – 3.07 (m, 1H, H-7), 2.78 – 2.64 (m, 1H, H-7`), 2.62 – 2.47 (m, 2H, H-5,5`), 2.14 – 1.83 (m, 2H, H-6.6`), 1.55 (s, 3H, 4a-CH3); LC-MS: m/z = 365 [M+1]; Anal. Calcd. for C20H17ClN4O: C, 65.84; H, 4.70; N, 15.36; found: C, 65.87; H, 4.75; N, 15.39.

2-(2-Bromophenyl)-4*a*-methyl-4*a*,5,6,7-tetrahydro-8*H*-pyrido[1,2-*a*][1,2,4]triazolo[1,5*-c*]quinazolin-8-one (**2.4**). Yield: 69%; mp = 146-149°С, IR (cm-1): 3434, 2949, 1682, 1632, 1609, 1581, 1561, 1545, 1506, 1479, 1464, 1442, 1423, 1382, 1372, 1360, 1335, 1318, 1278, 1251, 1208, 1197, 1172, 1140, 1127, 1112, 1098, 1046, 1025, 976, 941, 913, 855, 832, 785, 777, 759, 748, 715, 661, 644, 558, 533, 515; 1H NMR (400 MHz, DMSO-*d*6) δ 8.00 (d, *J* = 7.7 Hz, 1H, H-13), 7.90 (d, *J* = 7.7 Hz, 1H, 2-Ar H-6), 7.78 – 7.66 (m, 2H, H-10, 2-Ar H-3), 7.54 (t, *J* = 8.4 Hz, 1H, H-11), 7.49 – 7.38 (m, 2H, 2-Ar H-4,5), 7.33 (t, *J* = 8.4 Hz, 1H, H-12), 3.25 – 3.06 (m, 1H, H-7), 2.80 – 2.61 (m, 1H, H-7`), 2.58 – 2.45 (m, 2H, H-5,5`), 2.07 – 1.83 (m, 2H, H-6,6`), 1.55 (s, 3H, 4a-CH3). 13C NMR (126 MHz, DMSO) δ 169.5, 160.8, 148.6, 134.3, 134.2, 132.4, 132.2, 131.4, 130.8, 128.7, 128.2, 127.3, 124.3, 121.8, 119.4, 77.1 (C-4a), 33.5, 32.0, 27.0, 16.6; LC-MS: m/z = 409 [M+1]; Anal. Calcd. for C20H17BrN4O: C, 58.69; H, 4.19; N, 13.69; found: C, 58.72; H, 4.23; N, 13.74.

2-(4-Fluorophenyl)-4*a*-methyl-4*a*,5,6,7-tetrahydro-8*H*-pyrido[1,2-*a*][1,2,4]triazolo[1,5-*c*]quinazolin-8-one (**2.5**). Yield: 52% (method A), 92% (method B), 73% (method C); mp = 156-158°С, IR (cm-1): 3428, 2940, 1699, 1670, 1649, 1605, 1546, 1527, 1501, 1485, 1466, 1447, 1420, 1381, 1363, 1334, 1281, 1245, 1213, 1192, 1179, 1162, 1152, 1133, 1100, 1092, 1049, 1033, 1019, 1012, 981, 939, 915, 901, 853, 844, 814, 774, 757, 749, 713, 662, 616, 598, 570, 555, 530, 471; 1H NMR (400 MHz, DMSO-*d*6) δ 8.13 (dd, *J* = 8.6, 5.6 Hz, 2H, 2-Ar H-2,6), 8.00 (d, *J* = 7.6 Hz, 1H, H-13), 7.71 (d, *J* = 8.0 Hz, 1H, H-10), 7.54 (t, *J* = 8.3 Hz, 1H, H-11), 7.44 (t, *J* = 7.3 Hz, 1H, H-12), 7.18 (t, *J* = 8.7 Hz, 2H, 2-Ar H-3,5), 3.26 – 3.05 (m, 1H, H-7), 2.83 – 2.61 (m, 1H, H-7`), 2.62 – 2.52 (m, 2H, H-5,5`), 2.27 – 1.76 (m, 2H, H-6,6`), 1.52 (s, 3H, 4a-CH3); LC-MS: m/z = 349 [M+1]+; Anal. Calcd. for C20H17FN4O: C, 68.95; H, 4.92; N, 16.08; found: C, 68.91; H, 4.87; N, 16.02.

4*a*-Methyl-4*a*,5,6,7-tetrahydro-8*H*-pyrido[1,2-*a*]tetrazolo[1,5-*c*]quinazolin-8-one (**2.6**). Yield: 52% (method A), 89% (method B), 69% (method C); mp = 130-132°С, 1H NMR (400 MHz, DMSO-*d*6) δ 8.07 (d, *J* = 6.7 Hz, 1H, H-13), 7.76 (d, *J* = 7.6 Hz, 1H, H-10), 7.64 (t, *J* = 7.2 Hz, 1H, H-11), 7.50 (t, *J* = 6.7 Hz, 1H, H-12), 3.29 – 3.06 (m, 1H, H-7), 2.84 – 2.61 (m, 2H, H-5,7`), 2.58 – 2.51 (m, 1H, H-5`), 2.14 – 1.82 (m, 2H, H-5,5`), 1.56 (s, 3H, 4a-CH3). 13C NMR (126 MHz, DMSO) δ 169.2, 148.4, 134.5, 132.1, 128.9, 127.6, 125.2, 116.2, 77.6 (C-4a), 33.4, 32.0, 27.3, 16.4; EI-MS (m/z (I%rel.): 255 (9.9), 240 (91.3), 227 (37.3), 226 (65.8), 213 (10.6), 212 (100.0), 199 (10.3), 198 (17.1), 185 (22.6), 184 (47.5), 172 (44.2), 171 (19.7), 170 (22.5), 158 (56.3), 157 (32.6), 156 (37.2), 155 (20.7), 144 (65.5), 143 (37.5), 131 (20.7), 130 (31.7), 129 (54.3), 116 (22.9), 115 (19.2), 103 (52.3), 102 (73.8), 90 (28.7), 89 (19.4), 77 (29.6), 76 (37.8), 75 (21.3), 64 (20.9), 63 (24.5), 62 (20.3), 55 (77.3), 52 (15.3), 51 (37.8), 50 (29.2), 45 (9.8), 44 (10.2), 42 (31.2), 41 (30.4), 39 (42.3); LC-MS: m/z = 256 [M+1]; Anal. Calcd. for C13H13N5O: C, 61.17; H, 5.13; N, 27.43; found: C, 61.22; H, 5.17; N, 27.48.

5*a*-Methyl-3-phenyl-5*a*,6,7,8-tetrahydro-2*H*,9*H*-pyrido[1,2-*a*][1,2,4]triazino[2,3-*c*]quinazoline-2,9-dione (**2.7**). Yield: 59%; mp = 244-246°С, IR (cm-1): 3420, 3078, 3053, 2987, 2949, 1755, 1700, 1651, 1628, 1603, 1588, 1547, 1508, 1491, 1480, 1467, 1458, 1443, 1412, 1386, 1375, 1351, 1340, 1324, 1308, 1294, 1261, 1243, 1214, 1185, 1162, 1141, 1129, 1103, 1072, 1062, 1049, 1026, 976, 964, 949, 922, 913, 891, 879, 834, 815, 790, 783, 762, 704, 690, 670, 598, 580, 565, 531, 501, 475, 464; 1H NMR (400 MHz, DMSO-*d*6) δ 8.24 (d, *J* = 7.8 Hz, 1H, H-14), 8.19 (d, *J* = 7.9 Hz, 2H, 3-Ar H-2,6), 7.72 – 7.66 (m, 2H, H-11,12), 7.57 – 7.36 (m, 4H, H-13, 3-Ar H-3,4,5), 3.24 – 3.05 (m, 1H, H-8), 2.77 – 2.63 (m, 1H, H-8`), 2.58 – 2.23 (m, 2H, H-6,6`), 2.24 – 1.80 (m, 2H, H-7,7`), 1.60 (s, 3H, 5a-CH3). 13C NMR (126 MHz, DMSO) δ 169.6, 161.5, 151.9, 147.2, 137.0, 133.4, 133.2, 130.8, 129.2, 127.8, 127.0, 126.9, 122.4, 81.0 (C-5*a)*, 33.4, 31.8, 26.7, 16.4; EI-MS (m/z (I%rel.): 255 (20.3), 241 (27.3), 240 (100.0), 212 (57.1), 186 (31.3), 185 (26.3), 169 (10.3), 143 (22.3), 129 (6.3), 116 (5.1), 115 (5.0), 103 (13.3), 102 (23.4), 90 (6.3), 89 (12.1), 77 (8.7), 76 (16.7), 75 (6.4), 63 (9.5), 55 (24.1), 51 (8.8), 42 (16.2), 41 (15.6), 40 (14.2), 39 (15.9); LC-MS: m/z = 359 [M+1]; Anal. Calcd. for C21H18N4O2: C, 70.38; H, 5.06; N, 15.63; found: C, 70.41; H, 5.09; N, 15.67.

5*a*-Methyl-3-(p-tolyl)-5*a*,6,7,8-tetrahydro-2*H*,9*H*-pyrido[1,2-*a*][1,2,4]triazino[2,3-*c*]quinazoline-2,9-dione (**2.8**). Yield: 63%; mp = 262-265°С, IR (cm-1): 3436, 2980, 2943, 1699, 1648, 1603, 1589, 1544, 1516, 1501, 1481, 1469, 1442, 1416, 1402, 1374, 1352, 1343, 1324, 1311, 1261, 1245, 1212, 1187, 1142, 1128, 1102, 1062, 1049, 1034, 1020, 976, 967, 944, 913, 874, 831, 801, 788, 767, 717, 704, 683, 673, 660, 637, 603, 580, 561, 528, 501, 475, 464; 1H NMR (400 MHz, DMSO-*d*6) δ 8.23 (d, *J* = 7.8 Hz, 1H, H-14), 8.10 (d, *J* = 8.1 Hz, 2H, 3-Ar H-2,6), 7.74 – 7.60 (m, 2H, H-11,12), 7.58 – 7.40 (m, 1H, H-13), 7.25 (d, *J* = 8.0 Hz, 2H, 3-Ar H-3,5), 3.25 – 3.08 (m, 1H, H-8), 2.80 – 2.62 (m, 1H, H-8`), 2.58 – 2.51 (m, 2H, H-6,6`), 2.43 (s, 3H, 2-Ar-CH3), 2.12 – 1.78 (m, 2H, H-7,7`), 1.59 (s, 3H, 5a-CH3); LC-MS: m/z = 373 [M+1]; Anal. Calcd. for C22H20N4O2: C, 70.95; H, 5.41; N, 15.04; found: C, 70.99; H, 5.45; N, 15.07.

3-(4-Fluorophenyl)-5*a*-methyl-5*a*,6,7,8-tetrahydro-2*H*,9*H*-pyrido[1,2-*a*][1,2,4]triazino[2,3-*c*]quinazoline-2,9-dione (**2.9**). Yield: 56% (method A), 91% (method B); mp = 252-254°С, IR (cm-1): 3429, 2924, 2853, 1699, 1646, 1602, 1589, 1548, 1501, 1481, 1443, 1417, 1403, 1376, 1343, 1325, 1296, 1262, 1246, 1223, 1185, 1158, 1143, 1129, 1103, 1061, 1048, 1015, 977, 944, 846, 834, 820, 790, 769, 719, 704, 690, 672, 660, 603, 585, 561, 533, 501, 478, 462; 1H NMR (400 MHz, DMSO-*d*6) δ 8.29 (dd, *J* = 8.7, 5.7 Hz, 2H, 3-Ar H-2,6), 8.23 (d, *J* = 7.8 Hz, 1H, H-14), 7.79 – 7.53 (m, 2H, H-11,12), 7.59 – 7.38 (m, 1H, H-13), 7.19 (t, *J* = 8.7 Hz, 2H, 3-Ar H-3,5), 3.29 – 3.05 (m, 1H, H-8), 2.86 – 2.61 (m, 1H, H-8`), 2.55 – 2.39 (m, 2H, H-6,6`), 2.13 – 1.85 (m, 2H, H-7,7`), 1.59 (s, 3H, 5a-CH3). 13C NMR (126 MHz, DMSO-*d*6) δ 169.6, 163.8 (d, *J* = 248.4 Hz), 161.5, 152.0, 146.2, 137.0, 133.4, 131.7 (d, *J* = 8.5 Hz), 129.7 (d, *J* = 3.0 Hz), 127.8, 127.0, 126.9, 122.3, 115.7 (d, *J* = 21.6 Hz), 81.0 (C-5 *a*), 33.4, 31.8, 26.6, 16.3; LC-MS: m/z = 377 [M+1]; Anal. Calcd. for C21H17FN4O2: C, 67.01; H, 4.55; N, 14.89; found: C, 67.05; H, 4.59; N, 14.93.

13-Bromo-5*a*-methyl-3-phenyl-5*a*,6,7,8-tetrahydro-2*H*,9*H*-pyrido[1,2-*a*][1,2,4]triazino[2,3-*c*]quinazoline-2,9-dione (**2.10**). Yield: 60 %; mp = 240-243°С, IR (cm-1): 3434, 2924, 1686, 1649, 1600, 1582, 1546, 1506, 1477, 1446, 1420, 1401, 1380, 1361, 1334, 1291, 1247, 1214, 1186, 1171, 1149, 1127, 1102, 1078, 1048, 1034, 1019, 981, 959, 939, 892, 839, 815, 750, 714, 697, 688, 636, 617, 580, 564, 549, 531, 519, 505, 457; 1H NMR (400 MHz, DMSO-*d*6) δ 8.32 (d, *J* = 2.3 Hz, 1H, H-14), 8.25 – 8.11 (m, 2H, 3-Ar H-2,6), 7.81 (dd, *J* = 8.7, 2.3 Hz, 1H, H-12), 7.64 (d, *J* = 8.7 Hz, 1H, H-11), 7.53 – 7.30 (m, 3H, 3-Ar H-3,4,5), 3.18 – 3.06 (m, 1H, H-8,8`), 2.83 – 2.62 (m, 1H, H-6), 2.58 – 2.40 (m, 1H, H-6`), 2.11 – 1.86 (m, 2H, H-7,7`), 1.61 (s, 3H, 5a-CH3). 13C NMR (126 MHz, DMSO) δ 169.6, 161.3, 150.8, 147.5, 136.3, 135.9, 133.1, 131.0, 130.0, 129.2, 129.0, 128.6, 124.3, 119.1, 81.2 (C-5 *a*), 33.4, 31.7, 26.7, 16.3; LC-MS: m/z = 437 [M+1]; Anal. Calcd. for C21H17BrN4O2: C, 57.68; H, 3.92; N, 12.81; found: C, 57.72; H, 3.95; N, 12.86.

4-(5-Methyl-5,6-dihydrotetrazolo[1,5-*c*]quinazolin-5-yl)butanoic acid (**3.1**). Yield: 62%; mp = 171-172°С, 1H NMR (400 MHz, DMSO-*d*6) δ 11.83 (s, 1H, COOH), 7.76 (d, *J* = 7.8 Hz, 1H, H-10), 7.28 (t, *J* = 7.9 Hz, 1H, H-8), 7.18 (s, 1H, 6-NH), 6.87 (d, *J* = 8.2 Hz, 1H, H-7), 6.81 (t, *J* = 7.5 Hz, 1H, H-9), 2.26 – 2.09 (m, 3H, CH2CH2CH2COOH), 2.06 – 1.92 (m, 1H, CH2CH2CH2COOH), 1.82 (s, 3H, 5-CH3), 1.69 – 1.39 (m, 2H, CH2CH2CH2COOH); 13C NMR (126 MHz, DMSO) δ 169.2, 148.4, 134.5, 132.1, 128.9, 127.6, 125.2, 116.2, 78.0 (C-5), 33.4, 32.0, 27.3, 16.4; LC-MS: m/z = 274 [M+1]; Anal. Calcd. for C13H15N5O2: C, 57.13; H, 5.53; N, 25.63; found: C, 57.17; H, 5.56; N, 25.67.

4-(2-(4-Fluorophenyl)-5-methyl-5,6-dihydro-[1,2,4]triazolo[1,5-*c*]quinazolin-5-yl)butanoic acid (**3.2**). Yield: 72%; mp = 208-211°С, IR (cm-1): 3416 (COOH), 3234, 3208, 3114, 3042, 3008, 2960, 1901, 1704, 1626, 1606, 1598, 1529, 1486, 1470, 1451, 1438, 1415, 1371, 1337, 1272, 1248, 1220, 1170, 1154, 1132, 1106, 1092, 1048, 1037, 1010, 982, 939, 841, 813, 774, 751, 704, 636, 627, 567, 516, 491, 455; 1H NMR (400 MHz, DMSO-*d*6) δ 11.77 (s, 1H, COOH), 8.12 (dd, *J* = 8.3, 5.7 Hz, 2H, 2-Ar H-2,6), 7.70 (d, *J* = 7.6 Hz, 1H, H-10), 7.31 – 7.05 (m, 3H, H-8, 2-Ar H-3,5), 6.89 (s, 1H, 6-NH), 6.79 (d, *J* = 8.2 Hz, 1H, H-7), 6.73 (t, *J* = 7.5 Hz, 1H, H-9), 2.30 – 2.01 (m, 3H, CH2CH2CH2COOH), 2.01 – 1.89 (m, 1H, CH2CH2CH2COOH), 1.76 (s, 3H, 5-CH3), 1.73 – 1.61 (m, 1H, CH2CH2CH2COOH), 1.60 – 1.40 (m, 1H, CH2CH2CH2COOH). 13C NMR (126 MHz, DMSO-*d*6) δ 174.6, 163.2 (d, *J* = 245.8 Hz), 160.6, 150.1, 143.3, 132.4, 128.6 (d, *J* = 8.5 Hz), 128.1 – 127.9 (m), 124.4, 118.2, 116.1 (d, *J* = 21.7 Hz), 114.8, 109.6, 75.8 (C-5), 39.5, 33.8, 27.5, 19.4; LC-MS: m/z = 367 [M+1]; Anal. Calcd. for C20H19FN4O2: C, 65.56; H, 5.23; N, 15.29; found: C, 65.61; H, 5.27; N, 15.32.

4-(3-(4-Fluorophenyl)-6-methyl-2-oxo-6,7-dihydro-2*H*-[1,2,4]triazino[2,3-*c*]quinazolin-6-yl)butanoic acid (**3.3**). Yield: 67 %; mp = 217-219°С, IR (cm-1): 3435 (COOH), 1732, 1637, 1616, 1547, 1519, 1480, 1404, 1333, 1273, 1228, 1178, 1158, 1030, 949, 845, 751, 721, 524; 1H NMR (400 MHz, DMSO-*d*6) δ 11.78 (s, 1H, COOH), 8.30 (dd, *J* = 8.6, 5.7 Hz, 2H, 3-Ar H-2,6), 7.97 (d, *J* = 7.5 Hz, 1H, H-11), 7.40 (s, 1H, 7-NH), 7.34 (t, *J* = 7.6 Hz, 1H, H-9), 7.17 (t, *J* = 8.7 Hz, 2H, 3-Ar H-3,5), 6.90 – 6.65 (m, 2H, H-8,10), 2.37 – 2.24 (m, 1H, CH2CH2CH2COOH), 2.23 – 2.10 (m, 2H, CH2CH2CH2COOH), 1.99 – 1.81 (m, 1H, CH2CH2CH2COOH), 1.76 (s, 3H, 6-CH3), 1.71 – 1.51 (m, 2H, CH2CH2CH2COOH). 13C NMR (101 MHz, DMSO-*d*6) δ 174.72, 163.8 (d, *J* = 248.6 Hz), 161.1, 152.5, 146.3, 145.7, 135.6, 131.6 (d, *J* = 8.5 Hz), 129.8 (d, *J* = 2.8 Hz), 127.3, 118.7, 115.9 – 115.3 (m, 3C), 112.0, 79.3 (C-6), 38.4, 33.9, 25.7, 19.4; LC-MS: m/z = 395 [M+1]; Anal. Calcd. for C21H19FN4O3: C, 63.95; H, 4.86; N, 14.21; found: C, 63.94; H, 4.88; N, 14.25.

**X-ray structural study**

The colourless crystals of **2.4 (**C20H17N4ОBr) are orthorhombic. At 293 K ***a*** = 11.810(1), ***b*** = 15.1368(9), ***c*** = 19.878(2) Å, V = 3553.5(5) Å3, Mr = 409.29, Z = 8, space group Pbca, dcalc = 1.530 g/сm3, m(MoKa) = 2.330 mm-1, F(000) = 1664. Intensities of 34413 reflections (5178 independent, Rint = 0.169) were measured on the «Xcalibur-3» diffractometer (graphite monochromated MoKα radiation, CCD detector, ω-scaning, 2Θmax = 60°). The structure was solved by direct method using SHELXTL package [17]. The absorption was considering using “multi-scan” semi-empiric method (Tmin = 0.542, Tmax = 0.800). Positions of the hydrogen atoms were located from electron density difference maps and refined by “riding” model with Uiso = nUeq (n = 1.5 for methyl group and n = 1.2 for other hydrogen atoms) of the carrier atom. Full-matrix least-squares refinement against F2 in anisotropic approximation for non-hydrogen atoms using 5125 reflections was converged to wR2 = 0.185 (R1 = 0.075 for 1791 reflections with F>4σ(F), S = 0.888). The final atomic coordinates, and crystallographic data for molecule **2.4** were deposited to with the Cambridge Crystallographic Data Centre, 12 Union Road, CB2 1EZ, UK (fax: +44-1223-336033; e-mail: deposit@ccdc.cam.ac.uk) and are available on request quoting the deposition numbers CCDC 1962433).

Compound **2.1** (9*a*-Methyl-7,8,9,9*a*-tetrahydro-6*H*-benzo[4,5]imidazo[1,2-*c*]pyrido[1,2-*a*]quinazolin-6-one)

IR spectrum of compound **2.1**


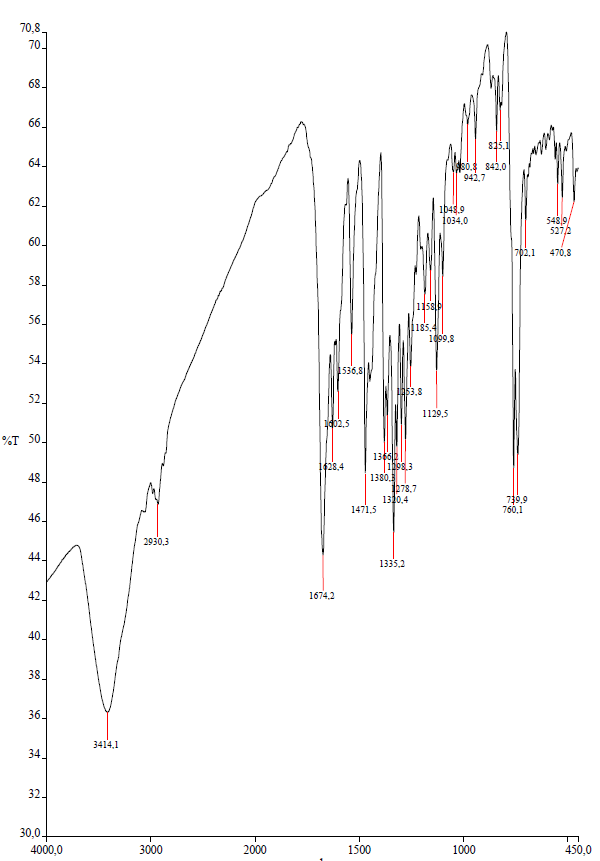


1H NMR spectrum of compound **2.1**

13C NMR spectrum of compound **2.1**


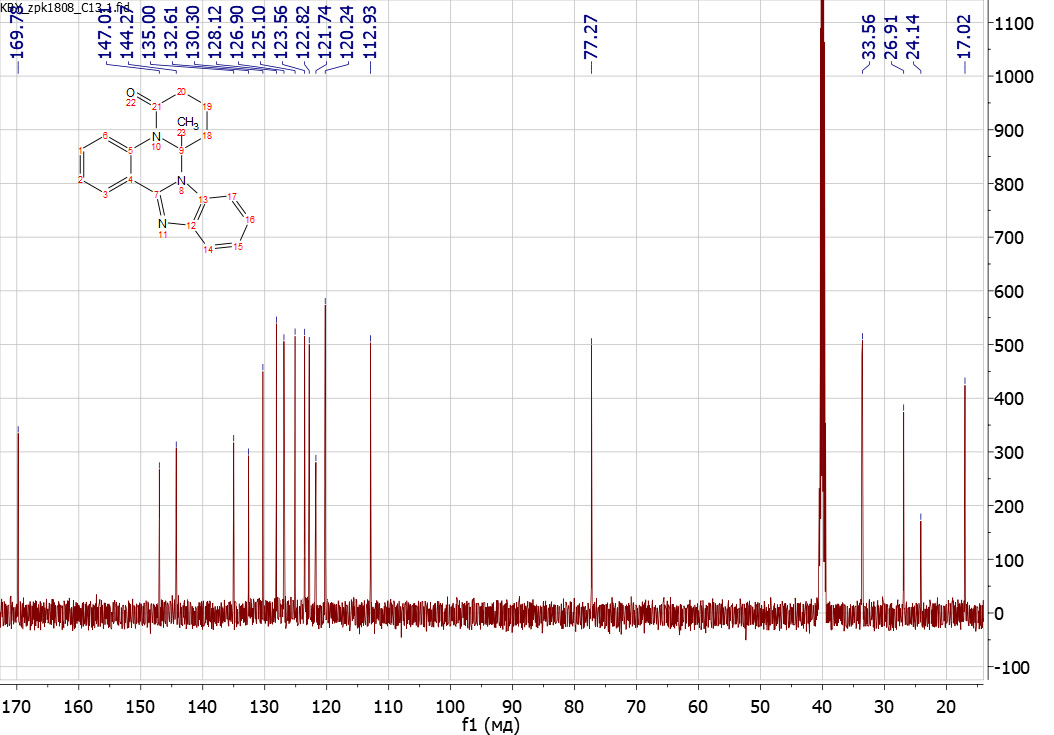


Compound **2.2** 2,4*a*-Dimethyl-4*a*,5,6,7-tetrahydro-8*H*-pyrido[1,2*-a*][1,2,4]triazolo[1,5-

1H NMR spectrum of compound **2.2**

13C NMR spectra of compound **2.2**

Compound **2.3** (2-(2-Chlorophenyl)-4*a*-methyl-4*a*,5,6,7-tetrahydro-8*H*-pyrido[1,2-*a*][1,2,4]triazolo[1,5-*c*]quinazolin-8-one)

IR spectrum of compound **2.3**


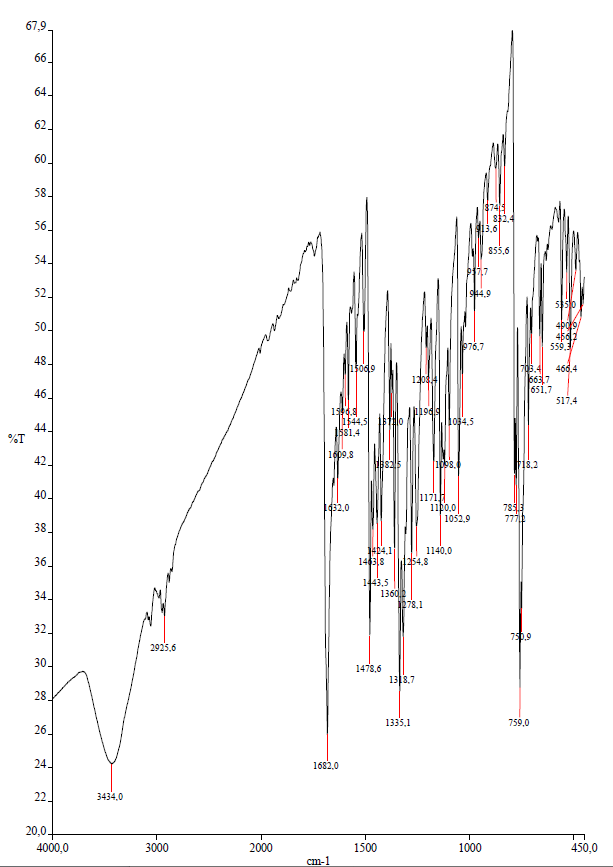


1H NMR spectra of compound **2.3**

Compound **2.4** (2-(2-Bromophenyl)-4*a*-methyl-4*a*,5,6,7-tetrahydro-8*H*-pyrido[1,2-*a*][1,2,4]triazolo[1,5*-c*]quinazolin-8-one)

IR spectrum of compound **2.4**


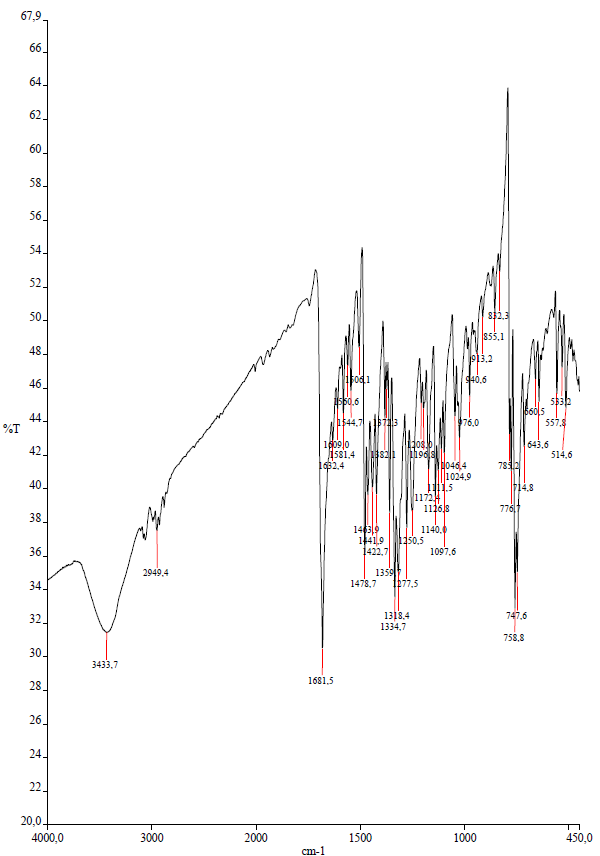


1H NMR spectra of compound **2.4**

13C NMR spectra of compound **2.4**


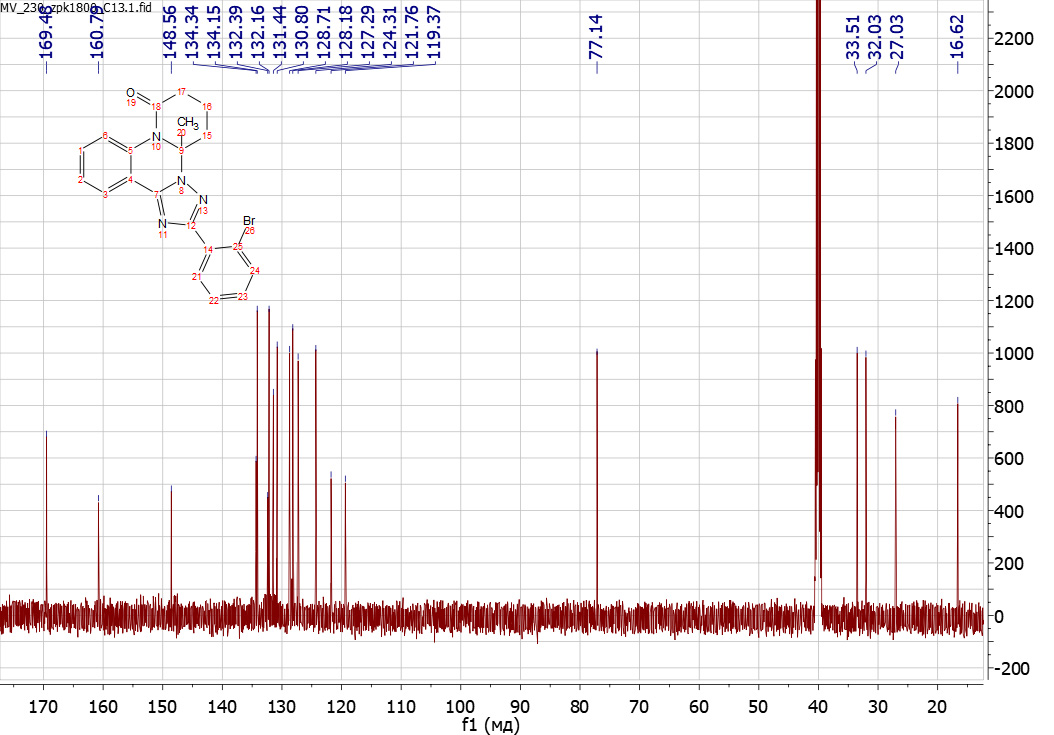


Structure of compound **2.4** according to the X-ray crystallographic data.


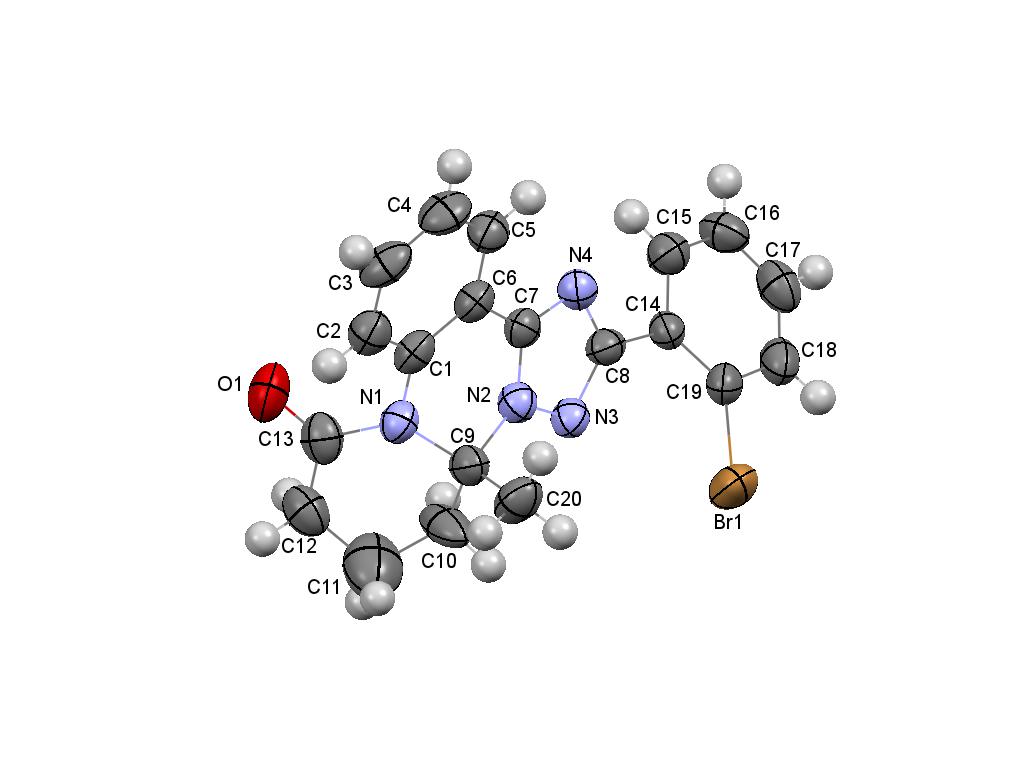


Compound **2.5** (2-(4-Fluorophenyl)-4*a*-methyl-4*a*,5,6,7-tetrahydro-8*H*-pyrido[1,2-*a*][1,2,4]triazolo[1,5-*c*]quinazolin-8-one)

IR spectrum of compound **2.5**


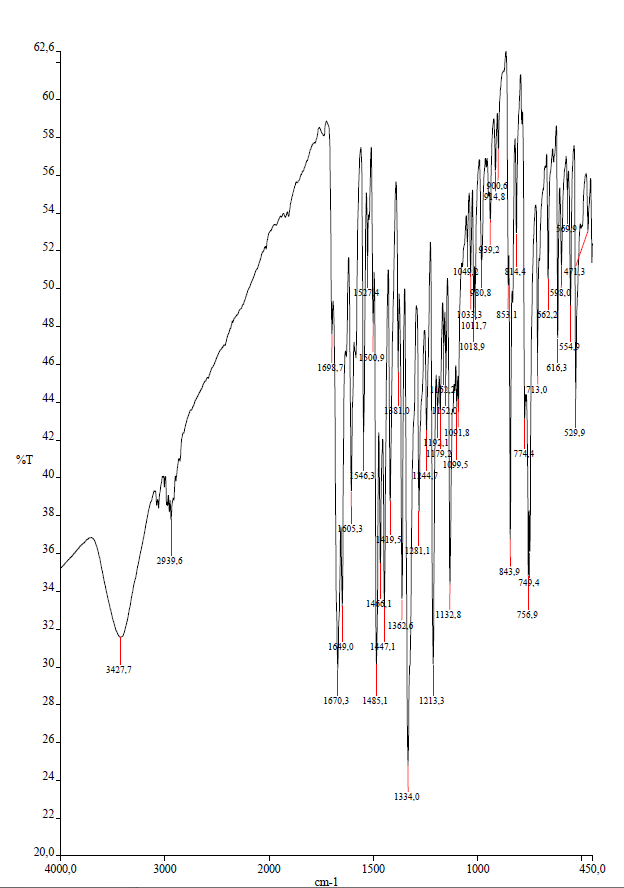


1H NMR spectrum of compound **2.5**

Compound **2.6** (4*a*-Methyl-4*a*,5,6,7-tetrahydro-8*H*-pyrido[1,2-*a*]tetrazolo[1,5-*c*]quinazolin-8-one)

1H NMR spectrum of compound **2.6**

13С NMR spectrum of compound **2.6**

Compound **2.7** (5*a*-Methyl-3-phenyl-5*a*,6,7,8-tetrahydro-2*H*,9*H*-pyrido[1,2-*a*][1,2,4]triazino[2,3-*c*]quinazoline-2,9-dione)

IR spectrum of compound **2.7**


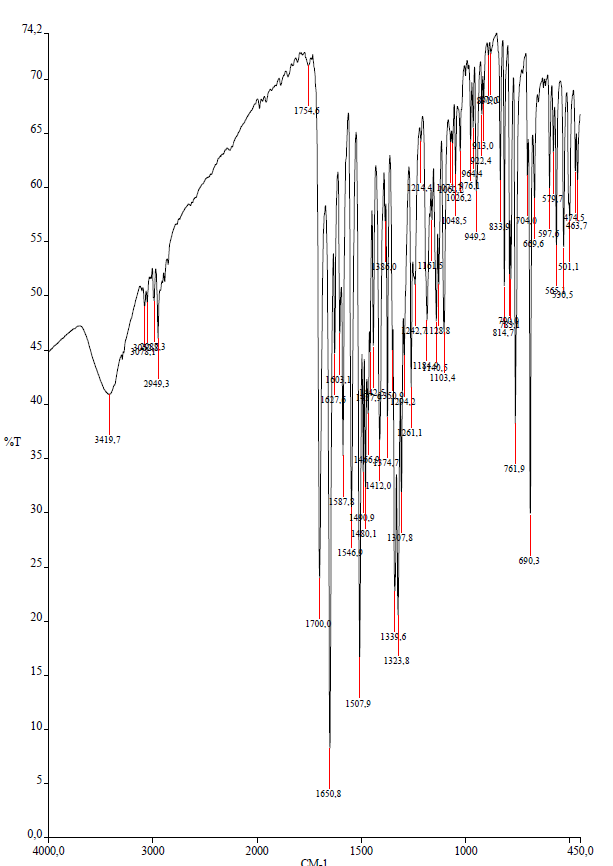


1H NMR-specrum of compound **2.7**

Compound **2.8** (5*a*-Methyl-3-(p-tolyl)-5*a*,6,7,8-tetrahydro-2*H*,9*H*-pyrido[1,2-*a*][1,2,4]triazino[2,3-*c*]quinazoline-2,9-dione)

IR spectrum of compound **2.8**


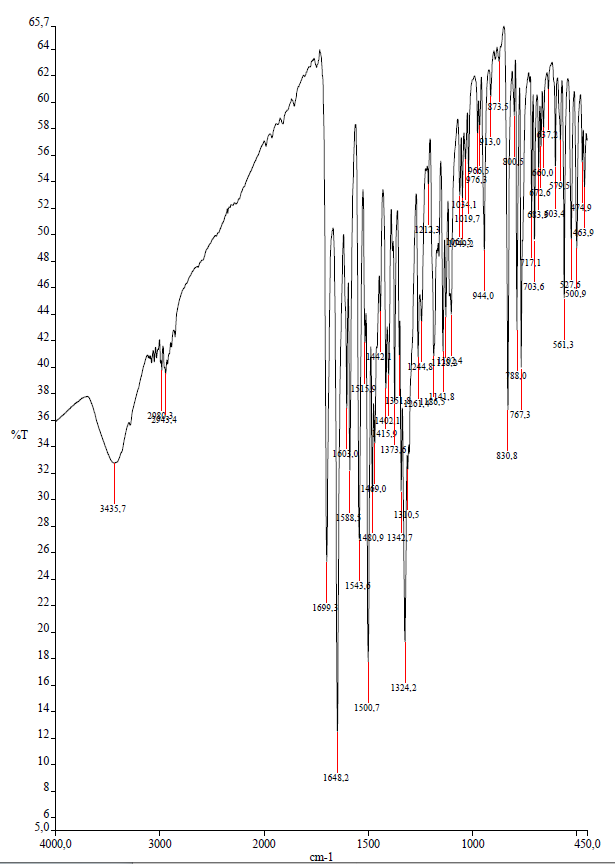


1H NMR spectrum of compound **2.8**

Compound **2.9** (3-(4-Fluorophenyl)-5*a*-methyl-5*a*,6,7,8-tetrahydro-2*H*,9*H*-pyrido[1,2-*a*][1,2,4]triazino[2,3-*c*]quinazoline-2,9-dione)

IR spectrum of compound **2.9**


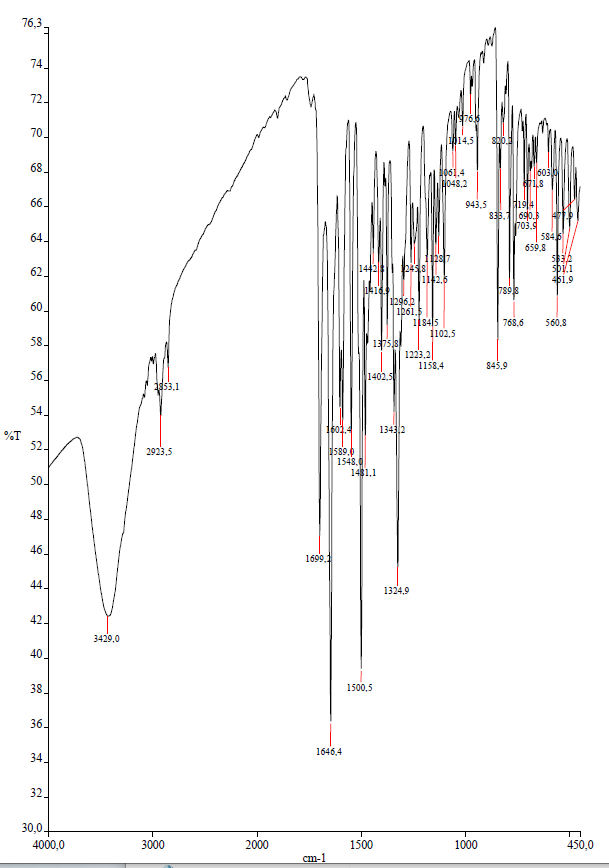


1H NMR spectrum of compound **2.9**

13C NMR spectrum of compound **2.9**

Compound **2.10** (13-Bromo-5*a*-methyl-3-phenyl-5*a*,6,7,8-tetrahydro-2*H*,9*H*-pyrido[1,2-*a*][1,2,4]triazino[2,3-*c*]quinazoline-2,9-dione)

IR spectrum of compound **2.10**


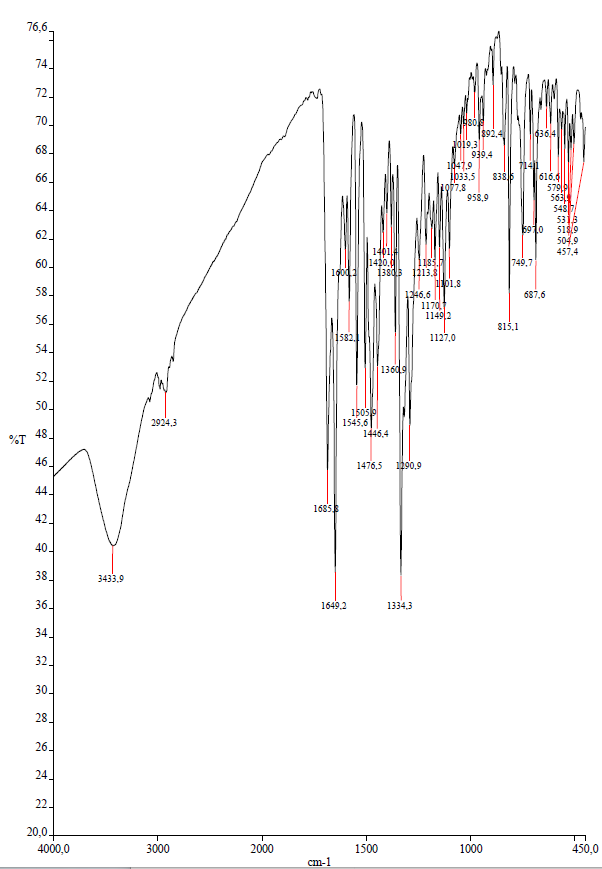


1H NMR spectrum of compound **2.10**

13C NMR spectrum of compound **2.10**

Compound **3.1** (4-(5-Methyl-5,6-dihydrotetrazolo[1,5-*c*]quinazolin-5-yl)butanoic acid)

1H NMR spectrum of compound **3.1**

13C NMR spectrum of compound **3.1**

Compound **3.2** (4-(2-(4-Fluorophenyl)-5-methyl-5,6-dihydro-[1,2,4]triazolo[1,5-*c*]quinazolin-5-yl)butanoic acid)

IR spectrum of compound **3.2**


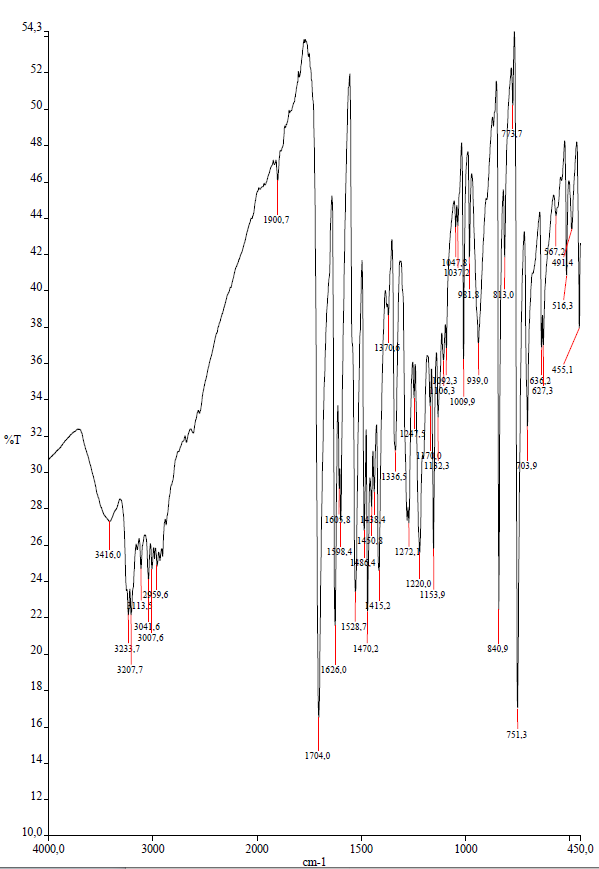


1H NMR spectrum of compound **3.2**

13C NMR spectrum of compound **3.2**

Compound **3.3** (4-(3-(4-Fluorophenyl)-6-methyl-2-oxo-6,7-dihydro-2*H*-[1,2,4]triazino[2,3-*c*]quinazolin-6-yl)butanoic acid)

IR spectrum of compound **3.3**


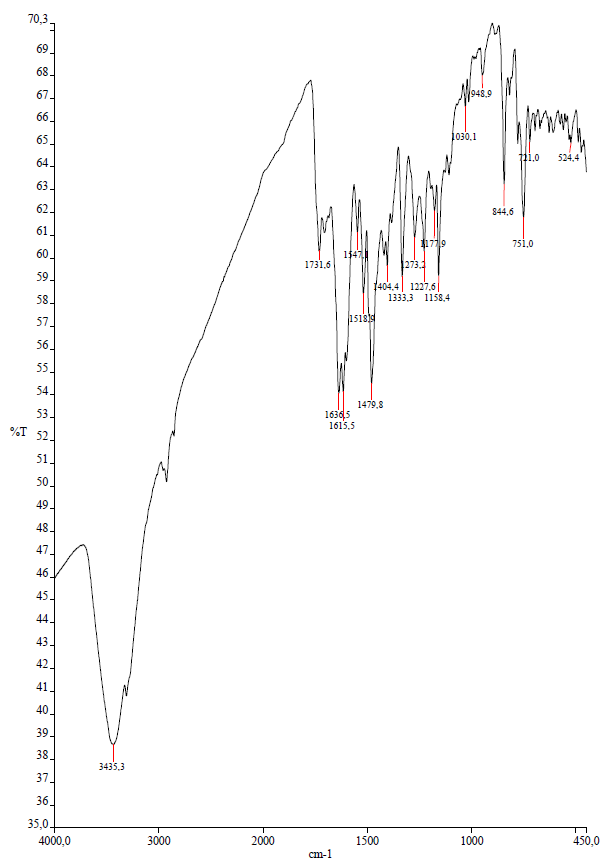


1H NMR spectrum of compound **3.3**

13C NMR spectrum of compound **3.3**
